# Supplementary material for: The d-electrons of Fe in ferrocene: the excess orbital energy spectrum (EOES)
Source: Royal Society of Chemistry journal article supplement (doi:10.1039/c4ra14506b), 2015-01-01
Supplement: c4ra14506b1.pdf [file c4ra14506b1.pdf]

## **The d-electrons of Fe in ferrocene: exceed orbital energy spectrum (EOES)**

### **Supplementary Materials**

Shawkat Islam and Feng Wang\*

Molecular Model Discovery Laboratory, Department of Chemistry and Biotechnology, Faculty  
of Science, Engineering and Technology, Swinburne University of Technology, Hawthorn,  
Melbourne, Victoria, 3122, Australia

\* Corresponding author. Tel.: +61 3 9214 5065; Fax: +61-3-9214-5921.

E-mail addresses: [fwang@swin.edu.au](mailto:fwang@swin.edu.au) (F. Wang).

**Table S1** Comparison of the calculated orbital energies of Fc using HF the B3LYP models.

| MO | B3LYP/m6-31G*    |                             |                 |                             |                              | HF/m6-31G*       |                             |                 |                            |                              |
|----|------------------|-----------------------------|-----------------|-----------------------------|------------------------------|------------------|-----------------------------|-----------------|----------------------------|------------------------------|
|    |                  | D <sub>5h</sub><br>E (a.u.) |                 | D <sub>5d</sub><br>E (a.u.) | Δε (Kcal•mol <sup>-1</sup> ) |                  | D <sub>5h</sub><br>E (a.u.) |                 | D <sub>5d</sub><br>E(a.u.) | Δε (Kcal•mol <sup>-1</sup> ) |
| 1  | a <sub>1</sub> ' | -256.07902                  | a <sub>1g</sub> | -256.07788                  | -0.72                        | a <sub>1</sub> ' | -261.35039                  | a <sub>1g</sub> | -261.34976                 | -0.40                        |
| 2  | a <sub>1</sub> ' | -30.03923                   | a <sub>1g</sub> | -30.03787                   | -0.85                        | a <sub>1</sub> ' | -31.93078                   | a <sub>1g</sub> | -31.92999                  | -0.50                        |
| 3  | a <sub>2</sub> " | -25.91638                   | a <sub>2u</sub> | -25.91536                   | -0.64                        | a <sub>2</sub> " | -27.42944                   | a <sub>2u</sub> | -27.42878                  | -0.41                        |
| 4  | e <sub>1</sub> ' | -25.89751                   | e <sub>1u</sub> | -25.89601                   | -0.94                        | e <sub>1</sub> ' | -27.40418                   | e <sub>1u</sub> | -27.40335                  | -0.52                        |
| 5  | e <sub>1</sub> ' | -25.89751                   | e <sub>1u</sub> | -25.89601                   | -0.94                        | e <sub>1</sub> ' | -27.40418                   | e <sub>1u</sub> | -27.40335                  | -0.52                        |
| 6  | a <sub>1</sub> ' | -10.18289                   | a <sub>1g</sub> | -10.18299                   | 0.06                         | a <sub>1</sub> ' | -11.22748                   | a <sub>1g</sub> | -11.22765                  | 0.11                         |
| 7  | a <sub>2</sub> " | -10.18287                   | a <sub>2u</sub> | -10.18298                   | 0.06                         | a <sub>2</sub> " | -11.22747                   | a <sub>2u</sub> | -11.22765                  | 0.11                         |
| 8  | e <sub>1</sub> ' | -10.18264                   | e <sub>1u</sub> | -10.18274                   | 0.06                         | e <sub>1</sub> ' | -11.22682                   | e <sub>1u</sub> | -11.22699                  | 0.11                         |
| 9  | e <sub>1</sub> ' | -10.18264                   | e <sub>1u</sub> | -10.18274                   | 0.06                         | e <sub>1</sub> ' | -11.22682                   | e <sub>1u</sub> | -11.22699                  | 0.11                         |
| 10 | e <sub>1</sub> " | -10.18261                   | e <sub>1g</sub> | -10.18271                   | 0.06                         | e <sub>1</sub> " | -11.22681                   | e <sub>1g</sub> | -11.22699                  | 0.11                         |
| 11 | e <sub>1</sub> " | -10.18261                   | e <sub>1g</sub> | -10.18271                   | 0.06                         | e <sub>1</sub> " | -11.22681                   | e <sub>1g</sub> | -11.22699                  | 0.11                         |
| 12 | e <sub>2</sub> " | -10.18219                   | e <sub>2u</sub> | -10.18229                   | 0.06                         | e <sub>2</sub> " | -11.22566                   | e <sub>2u</sub> | -11.22583                  | 0.11                         |
| 13 | e <sub>2</sub> " | -10.18219                   | e <sub>2u</sub> | -10.18229                   | 0.06                         | e <sub>2</sub> " | -11.22566                   | e <sub>2u</sub> | -11.22583                  | 0.11                         |
| 14 | e <sub>2</sub> ' | -10.18216                   | e <sub>2g</sub> | -10.18227                   | 0.07                         | e <sub>2</sub> ' | -11.22565                   | e <sub>2g</sub> | -11.22583                  | 0.11                         |
| 15 | e <sub>2</sub> ' | -10.18216                   | e <sub>2g</sub> | -10.18227                   | 0.07                         | e <sub>2</sub> ' | -11.22565                   | e <sub>2g</sub> | -11.22583                  | 0.11                         |
| 16 | a <sub>1</sub> ' | -3.41056                    | a <sub>1g</sub> | -3.40949                    | -0.67                        | a <sub>1</sub> ' | -4.11094                    | a <sub>1g</sub> | -4.11048                   | -0.29                        |
| 17 | a <sub>2</sub> " | -2.21232                    | a <sub>2u</sub> | -2.21169                    | -0.40                        | a <sub>2</sub> " | -2.71397                    | a <sub>2u</sub> | -2.71348                   | -0.31                        |
| 18 | e <sub>1</sub> ' | -2.16587                    | e <sub>1u</sub> | -2.16459                    | -0.80                        | e <sub>1</sub> ' | -2.67898                    | e <sub>1u</sub> | -2.67853                   | -0.28                        |
| 19 | e <sub>1</sub> ' | -2.16587                    | e <sub>1u</sub> | -2.16459                    | -0.80                        | e <sub>1</sub> ' | -2.67898                    | e <sub>1u</sub> | -2.67853                   | -0.28                        |
| 20 | a <sub>1</sub> ' | -0.88364                    | a <sub>1g</sub> | -0.88343                    | -0.13                        | a <sub>1</sub> ' | -1.18319                    | a <sub>1g</sub> | -1.18304                   | -0.09                        |
| 21 | a <sub>2</sub> " | -0.86796                    | a <sub>2u</sub> | -0.86798                    | 0.01                         | a <sub>2</sub> " | -1.1629                     | a <sub>2u</sub> | -1.16303                   | 0.08                         |
| 22 | e <sub>1</sub> " | -0.70583                    | e <sub>1g</sub> | -0.70575                    | -0.05                        | e <sub>1</sub> " | -0.9602                     | e <sub>1g</sub> | -0.96021                   | 0.01                         |
| 23 | e <sub>1</sub> " | -0.70583                    | e <sub>1g</sub> | -0.70575                    | -0.05                        | e <sub>1</sub> " | -0.9602                     | e <sub>1g</sub> | -0.96021                   | 0.01                         |
| 24 | e <sub>1</sub> ' | -0.70498                    | e <sub>1u</sub> | -0.70488                    | -0.06                        | e <sub>1</sub> ' | -0.9598                     | e <sub>1u</sub> | -0.95977                   | -0.02                        |
| 25 | e <sub>1</sub> ' | -0.70498                    | e <sub>1u</sub> | -0.70488                    | -0.06                        | e <sub>1</sub> ' | -0.9598                     | e <sub>1u</sub> | -0.95977                   | -0.02                        |
| 26 | e <sub>2</sub> ' | -0.54204                    | e <sub>2g</sub> | -0.54168                    | -0.23                        | e <sub>2</sub> ' | -0.74315                    | e <sub>2g</sub> | -0.74272                   | -0.27                        |
| 27 | e <sub>2</sub> ' | -0.54204                    | e <sub>2g</sub> | -0.54168                    | -0.23                        | e <sub>2</sub> ' | -0.74315                    | e <sub>2g</sub> | -0.74272                   | -0.27                        |
| 28 | e <sub>2</sub> " | -0.53415                    | e <sub>2u</sub> | -0.53453                    | 0.24                         | e <sub>2</sub> " | -0.73117                    | e <sub>2u</sub> | -0.73169                   | 0.33                         |
| 29 | e <sub>2</sub> " | -0.53415                    | e <sub>2u</sub> | -0.53453                    | 0.24                         | e <sub>2</sub> " | -0.73117                    | e <sub>2u</sub> | -0.73169                   | 0.33                         |
| 30 | a <sub>1</sub> ' | -0.5315                     | a <sub>1g</sub> | -0.53125                    | -0.16                        | a <sub>1</sub> ' | -0.7242                     | a <sub>1g</sub> | -0.72384                   | -0.23                        |
| 31 | a <sub>2</sub> " | -0.51875                    | a <sub>2u</sub> | -0.51888                    | 0.08                         | a <sub>2</sub> " | -0.69948                    | a <sub>2u</sub> | -0.69967                   | 0.12                         |
| 32 | e <sub>1</sub> " | -0.40515                    | e <sub>1g</sub> | -0.40513                    | -0.01                        | e <sub>1</sub> " | -0.55802                    | e <sub>1g</sub> | -0.55828                   | 0.16                         |
| 33 | e <sub>1</sub> " | -0.40515                    | e <sub>1g</sub> | -0.40513                    | -0.01                        | e <sub>1</sub> " | -0.55802                    | e <sub>1g</sub> | -0.55828                   | 0.16                         |
| 34 | a <sub>1</sub> ' | -0.40351                    | a <sub>1g</sub> | -0.40341                    | -0.06                        | a <sub>1</sub> ' | -0.56217                    | a <sub>1g</sub> | -0.56232                   | 0.09                         |
| 35 | e <sub>1</sub> ' | -0.39664                    | e <sub>1u</sub> | -0.3961                     | -0.34                        | e <sub>1</sub> ' | -0.55251                    | e <sub>1u</sub> | -0.55186                   | -0.41                        |
| 36 | e <sub>1</sub> ' | -0.39664                    | e <sub>1u</sub> | -0.3961                     | -0.34                        | e <sub>1</sub> ' | -0.55251                    | e <sub>1u</sub> | -0.55186                   | -0.41                        |
| 37 | e <sub>2</sub> ' | -0.37516                    | e <sub>2u</sub> | -0.37316                    | -1.26                        | e <sub>2</sub> ' | -0.52637                    | e <sub>2g</sub> | -0.52334                   | -1.90                        |
| 38 | e <sub>2</sub> ' | -0.37516                    | e <sub>2u</sub> | -0.37316                    | -1.26                        | e <sub>2</sub> ' | -0.52637                    | e <sub>2g</sub> | -0.52334                   | -1.90                        |
| 39 | e <sub>2</sub> " | -0.3705                     | e <sub>2g</sub> | -0.37251                    | 1.26                         | e <sub>2</sub> " | -0.51755                    | e <sub>2u</sub> | -0.52087                   | 2.08                         |
| 40 | e <sub>2</sub> " | -0.3705                     | e <sub>2g</sub> | -0.37251                    | 1.26                         | e <sub>2</sub> " | -0.51755                    | e <sub>2u</sub> | -0.52087                   | 2.08                         |
| 41 | a <sub>2</sub> " | -0.35211                    | a <sub>2u</sub> | -0.35249                    | 0.24                         | a <sub>2</sub> " | -0.49016                    | a <sub>2u</sub> | -0.49072                   | 0.35                         |
| 42 | e <sub>1</sub> " | -0.26125                    | e <sub>1g</sub> | -0.26139                    | 0.09                         | e <sub>1</sub> " | -0.33588                    | e <sub>1g</sub> | -0.3361                    | 0.14                         |
| 43 | e <sub>1</sub> " | -0.26125                    | e <sub>1g</sub> | -0.26139                    | 0.09                         | e <sub>1</sub> " | -0.33588                    | e <sub>1g</sub> | -0.3361                    | 0.14                         |
| 44 | e <sub>1</sub> ' | -0.24297                    | e <sub>1u</sub> | -0.24265                    | -0.20                        | e <sub>1</sub> ' | -0.33681                    | e <sub>1u</sub> | -0.33649                   | -0.20                        |
| 45 | e <sub>1</sub> ' | -0.24297                    | e <sub>1u</sub> | -0.24265                    | -0.20                        | e <sub>1</sub> ' | -0.33681                    | e <sub>1u</sub> | -0.33649                   | -0.20                        |
| 46 | a <sub>1</sub> ' | -0.22052                    | a <sub>1g</sub> | -0.22                       | -0.33                        | a <sub>1</sub> ' | -0.50021                    | a <sub>1g</sub> | -0.50003                   | -0.11                        |
| 47 | e <sub>2</sub> ' | -0.18877                    | e <sub>2g</sub> | -0.18744                    | -0.83                        | e <sub>2</sub> ' | -0.41485                    | e <sub>2g</sub> | -0.41484                   | -0.01                        |
| 48 | e <sub>2</sub> ' | -0.18877                    | e <sub>2g</sub> | -0.18744                    | -0.83                        | e <sub>2</sub> ' | -0.41485                    | e <sub>2g</sub> | -0.41484                   | -0.01                        |

**Figure S1** Core EOES of the E-Fc and S-Fc ferrocene conformers using B3LYP/m6-31G (d) model

| MO                          | $\Delta\varepsilon$ (Kcal $\cdot$ mol $^{-1}$ ) | E-Fc ( $D_{5h}$ ) | S-Fc ( $D_{5d}$ ) |
|-----------------------------|-------------------------------------------------|-------------------|-------------------|
| 1<br>$a_1'$ ( $a_{1g}$ )    | -0.72                                           |                   |                   |
| 2<br>$a_1'$ ( $a_{1g}$ )    | -0.85                                           |                   |                   |
| 3<br>$a_2''$ ( $a_{2u}$ )   | -0.64                                           |                   |                   |
| 4, 5<br>$e_1'$ ( $e_{1u}$ ) | -0.94                                           |                   |                   |
